# Supplementary material for: Ratiometric luminescent sensing of a biomarker for sugar consumption in an aqueous medium using a Cu(ii) coordination polymer
Source: Royal Society of Chemistry journal article supplement (doi:10.1039/d3dt00022b), 2023-01-01
Supplement: d3dt00022b1.pdf [file d3dt00022b1.pdf]

## Ratiometric Luminescent Sensing of Biomarker for Sugar Consumption in Aqueous Medium by Cu(II)Coordination Polymer

Somnath<sup>a</sup>, Musheer Ahmad<sup>b</sup> and Kafeel Ahmad Siddiqui<sup>a</sup>

<sup>a</sup>Department of Chemistry, National Institute of Technology Raipur, G E Road Raipur – 492010, Chhattisgarh, India

<sup>b</sup>Department of Applied Chemistry, Faculty of Engineering and Technology, ZHCET, Aligarh Muslim University, Aligarh, UP (India) – 202002

<sup>a</sup> e-mail: [kasiddiqui.chy@nitrr.ac.in](mailto:kasiddiqui.chy@nitrr.ac.in)

**Table S1** Crystallographic and structural refinement parameters for [Cu(Hadp)<sub>2</sub>(Bimb)]<sub>n</sub> (KA@CP-S3).

|                                         |                                                                 |
|-----------------------------------------|-----------------------------------------------------------------|
| Empirical formula                       | C <sub>26</sub> H <sub>32</sub> CuN <sub>4</sub> O <sub>8</sub> |
| Formula weight                          | 592.11                                                          |
| Temperature/K                           | 293(2)                                                          |
| Crystal system                          | Triclinic                                                       |
| Space group                             | P $\bar{1}$                                                     |
| a/Å                                     | 8.4173(5)                                                       |
| b/Å                                     | 8.4366(5)                                                       |
| c/Å                                     | 10.5472(7)                                                      |
| $\alpha$ /°                             | 92.125(5)                                                       |
| $\beta$ /°                              | 93.821(6)                                                       |
| $\gamma$ /°                             | 118.349(6)                                                      |
| Volume/Å <sup>3</sup>                   | 655.69(8)                                                       |
| Z                                       | 1                                                               |
| $\rho_{\text{calc}}$ /g/cm <sup>3</sup> | 1.4994                                                          |
| $\mu$ /mm <sup>-1</sup>                 | 0.890                                                           |
| F(000)                                  | 309.5                                                           |
| Crystal size/mm <sup>3</sup>            | 0.47 × 0.27 × 0.14                                              |
| Radiation                               | Mo K $\alpha$ ( $\lambda$ = 0.71073)                            |
| 2 $\theta$ range for data collection/°  | 3.88 to 51                                                      |
| Index ranges                            | -10 ≤ h ≤ 10, -10 ≤ k ≤ 10, -13 ≤ l ≤ 13                        |
| Reflections collected                   | 15059                                                           |

|                                                |                                                                  |
|------------------------------------------------|------------------------------------------------------------------|
| Independent reflections                        | 2447 [ $R_{\text{int}} = 0.0922$ , $R_{\text{sigma}} = 0.0611$ ] |
| Data/restraints/parameters                     | 2447/0/179                                                       |
| Goodness-of-fit on $F^2$                       | 1.042                                                            |
| Final R indexes [ $I \geq 2\sigma(I)$ ]        | $R_1 = 0.1362$ , $wR_2 = 0.4106$                                 |
| Final R indexes [all data]                     | $R_1 = 0.1501$ , $wR_2 = 0.4186$                                 |
| Largest diff. peak/hole / $e \text{ \AA}^{-3}$ | 2.95/-1.13                                                       |
| CCDC No.                                       | 2233819                                                          |

**Table S2** Selected bond lengths [ $\text{\AA}$ ] and bond angles [ $^\circ$ ] for  $[\text{Cu}(\text{Hadp})_2(\text{Bimb})]_n$  (**KA@CP-S3**).

| <i><b><math>[\text{Cu}(\text{Hadp})_2(\text{Bimb})]_n</math> (KA@CP-S3)</b></i> |          |                                      |       |                                      |           |
|---------------------------------------------------------------------------------|----------|--------------------------------------|-------|--------------------------------------|-----------|
| <i>Bond lengths [<math>\text{\AA}</math>]</i>                                   |          |                                      |       |                                      |           |
| Cu1–O1                                                                          | 1.968(9) | Cu1–O3                               | 2.735 | Cu1–N1                               | 1.981(11) |
| Cu1–O1 <sup>1</sup>                                                             | 1.968(9) | Cu1–O3 <sup>1</sup>                  | 2.735 | Cu1–N1 <sup>1</sup>                  | 1.981(11) |
| <i>Bond angles [<math>^\circ</math>]</i>                                        |          |                                      |       |                                      |           |
| O1 <sup>1</sup> –Cu1–O1                                                         | 180.0    | N1 <sup>1</sup> –Cu1–O3              | 89.8  | N1–Cu1–O1 <sup>1</sup>               | 89.2(4)   |
| N1 <sup>1</sup> –Cu1–O1 <sup>1</sup>                                            | 90.8(4)  | N1–Cu1–O3                            | 90.2  | N1–Cu1–O1                            | 90.8(4)   |
| N1 <sup>1</sup> –Cu1–O1                                                         | 89.2(4)  | O3–Cu1–O3 <sup>1</sup>               | 180.0 | N1 <sup>1</sup> –Cu1–N1              | 180.0     |
| O1 <sup>1</sup> –Cu1–O3                                                         | 94.9     | O3 <sup>1</sup> –Cu1–N1 <sup>1</sup> | 90.2  | O1 <sup>1</sup> –Cu1–O3 <sup>1</sup> | 85.1      |
| O1–Cu1–O3                                                                       | 85.1     | O3 <sup>1</sup> –Cu1–N1              | 89.8  | O1–Cu1–O3 <sup>1</sup>               | 94.9      |

Symmetry codes for **KA@CP-S3**: (i) 1-X,2-Y,1-Z; (ii) 1-X,1-Y,2-Z

Table S3 Chemical structures dyes included in present work.

|                                 |                                                                                                                                                                                                                                                                                                                                                                                                                                                                                                                                                                                                                                                                                                                                                                                                                                                                                                                                                                                                                                                                                                                |
|---------------------------------|----------------------------------------------------------------------------------------------------------------------------------------------------------------------------------------------------------------------------------------------------------------------------------------------------------------------------------------------------------------------------------------------------------------------------------------------------------------------------------------------------------------------------------------------------------------------------------------------------------------------------------------------------------------------------------------------------------------------------------------------------------------------------------------------------------------------------------------------------------------------------------------------------------------------------------------------------------------------------------------------------------------------------------------------------------------------------------------------------------------|
| <p><b>Anionic<br/>Dyes</b></p>  | <div style="display: flex; justify-content: space-around; align-items: flex-start;"> <div style="text-align: center;"> 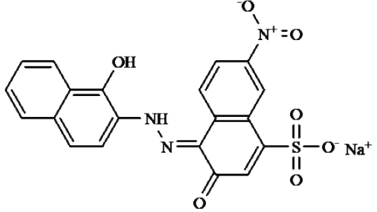 <p><b>(EBT)</b></p> </div> <div style="text-align: center;">  <p><b>(RB)</b></p> </div> <div style="text-align: center;">  <p><b>(BPB)</b></p> </div> </div> <div style="display: flex; justify-content: space-around; align-items: flex-start; margin-top: 20px;"> <div style="text-align: center;">  <p><b>(CR)</b></p> </div> <div style="text-align: center;">  <p><b>(MO)</b></p> </div> </div>                                                                                                                                                         |
| <p><b>Cationic<br/>Dyes</b></p> | <div style="display: flex; justify-content: space-around; align-items: flex-start;"> <div style="text-align: center;">  <p><b>(MV)</b></p> </div> <div style="text-align: center;">  <p><b>(CV)</b></p> </div> <div style="text-align: center;">  <p><b>(RhB)</b></p> </div> </div> <div style="display: flex; justify-content: space-around; align-items: flex-start; margin-top: 20px;"> <div style="text-align: center;">  <p><b>(MB)</b></p> </div> <div style="text-align: center;">  <p><b>(Rh6G)</b></p> </div> <div style="text-align: center;">  <p><b>(SO)</b></p> </div> </div> |
| <p><b>Neutral<br/>Dyes</b></p>  | <div style="display: flex; justify-content: space-around; align-items: flex-start;"> <div style="text-align: center;">  <p><b>(FS)</b></p> </div> <div style="text-align: center;">  <p><b>(NR)</b></p> </div> </div>                                                                                                                                                                                                                                                                                                                                                                                                                                                                                                                                                                                                                                                                                                                   |

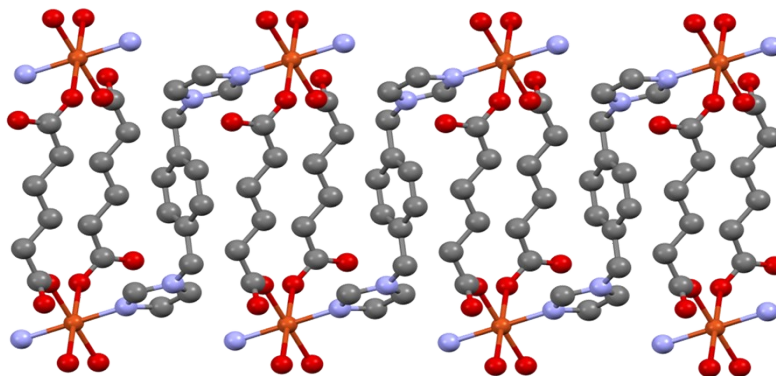

**Fig. S1** View of 1D coordination polymer of **KA@CP-S3** formed through both  $\text{Hadp}^-$  and  $\text{Bimb}$  ligands along crystallographic “a” axis.

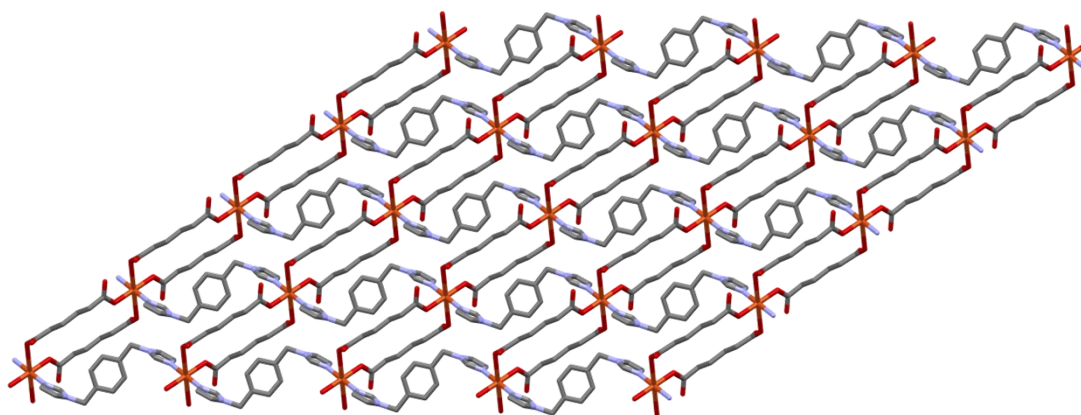

**Fig. S2** View of 2D coordination network of **KA@CP-S3** along crystallographic “a” axis.

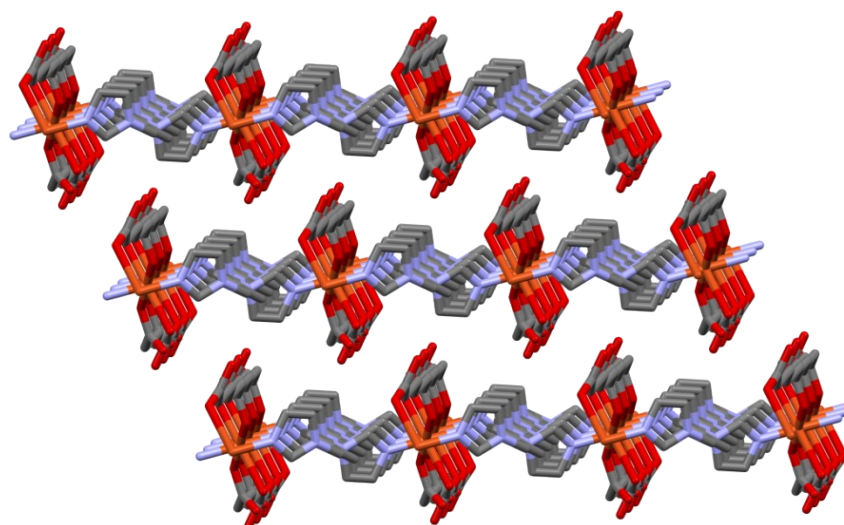

**Fig. S3** View of 2D Parallel Layers of **KA@CP-S3** along crystallographic “c” axis.

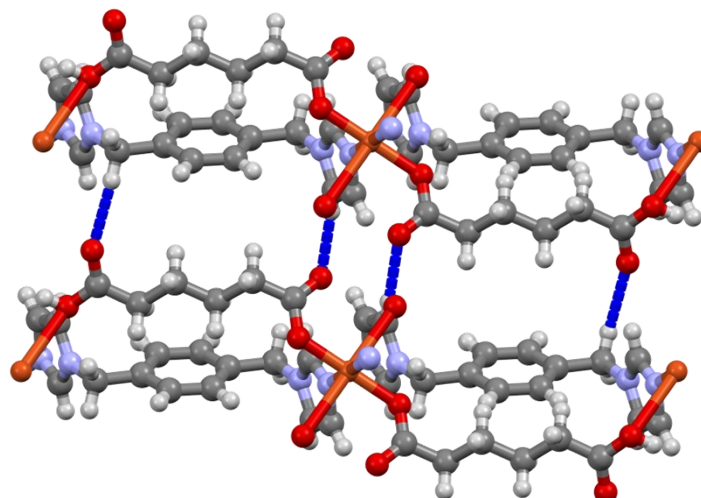

**Fig. S4** View of C–H···O supramolecular hydrogen bonded 3D network of **KA@CP-S3** along crystallographic “b” axis.

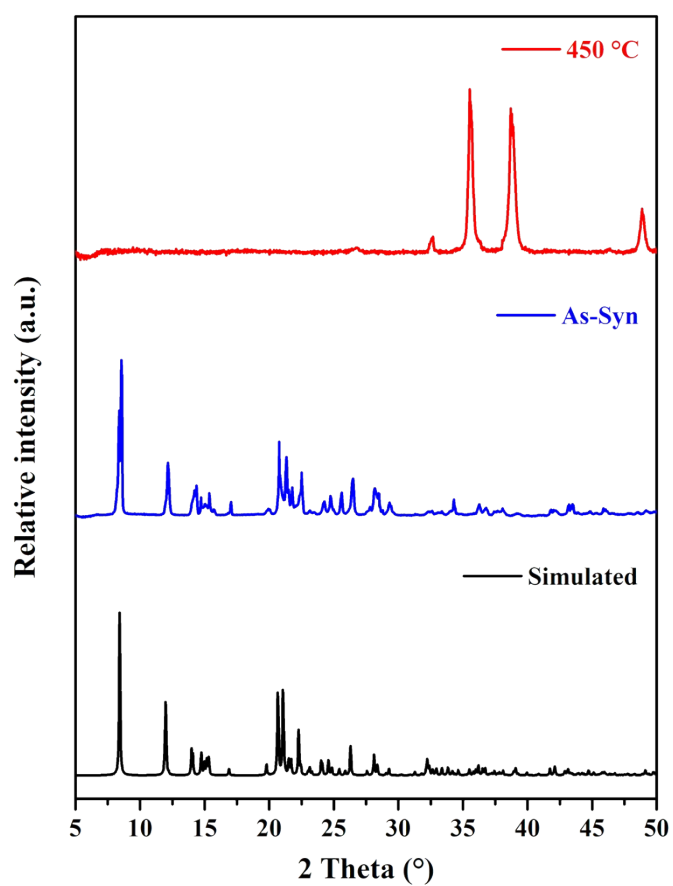

**Fig. S5** Powder X-ray Diffraction spectra for **KA@CP-S3**.

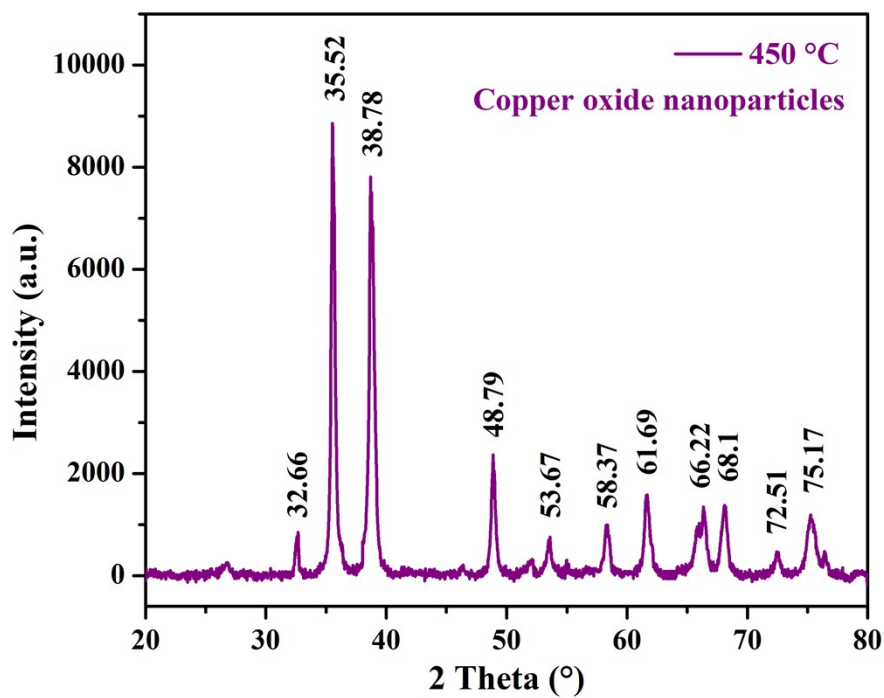

**Fig. S6** PXRD patterns for CuO nanoparticles.

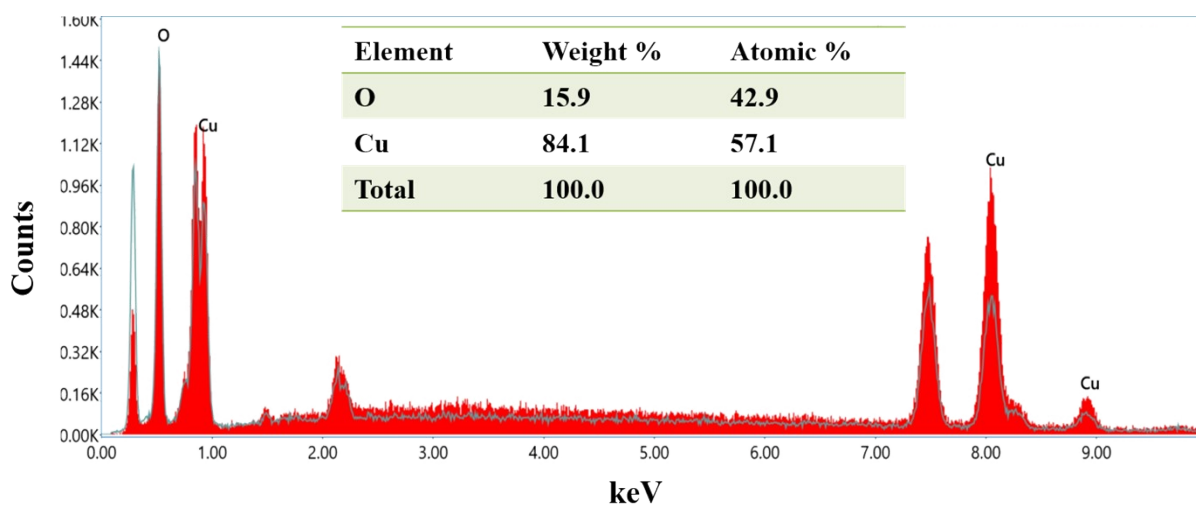

**Fig. S7** EDAX diagram of CuO nanoparticles.

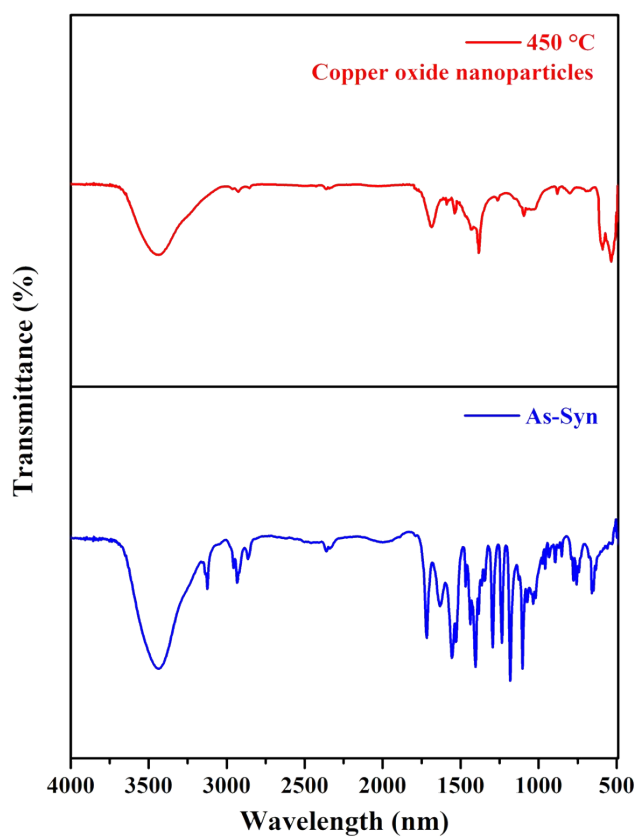

**Fig. S8** FT-IR spectra for KA@CP-S3.

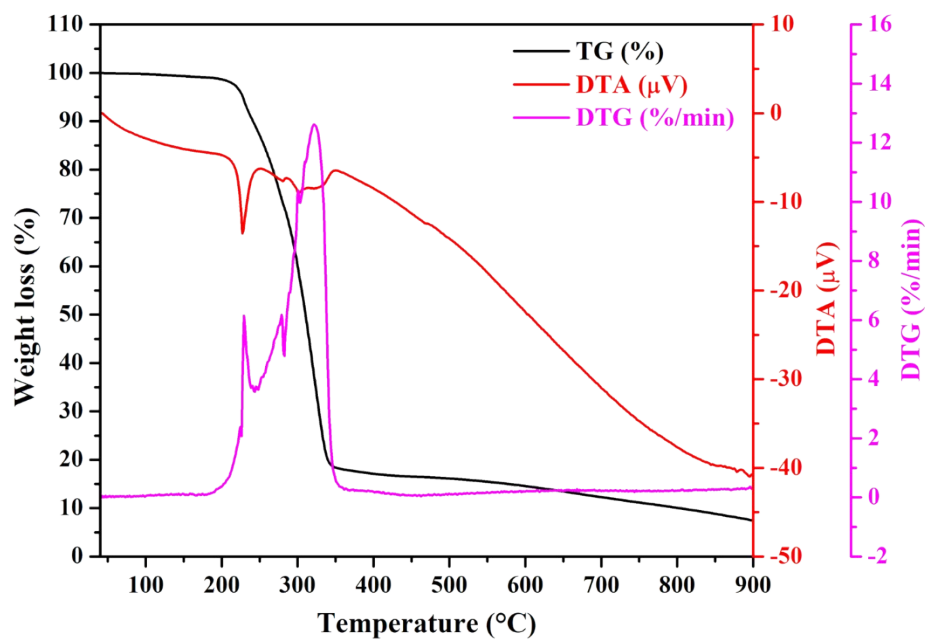

**Fig. S9** TG-DTA-DTG curves for KA@CP-S3.

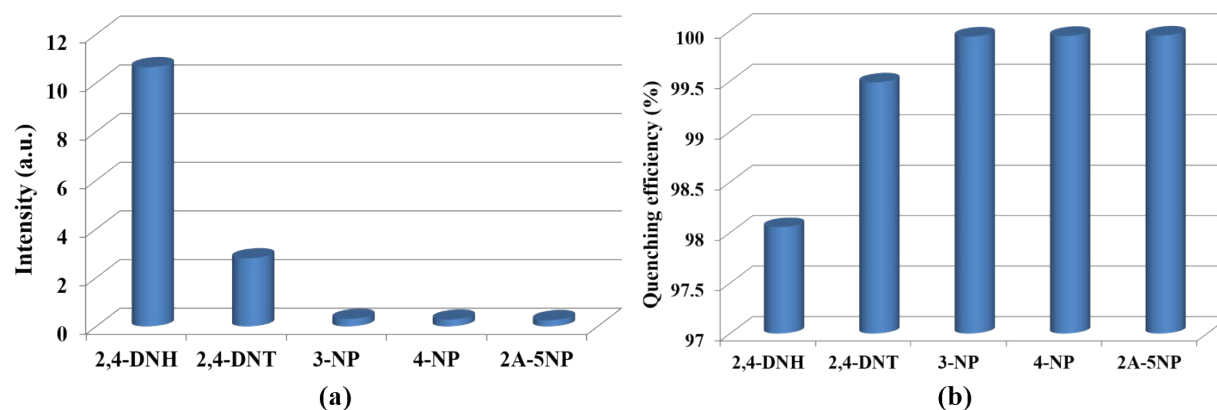

**Fig. S10** (a) Fluorescence emission intensities and (b) Relative fluorescence quenching efficiencies of KA@CP-S3 with different nitrobenzene derivatives.

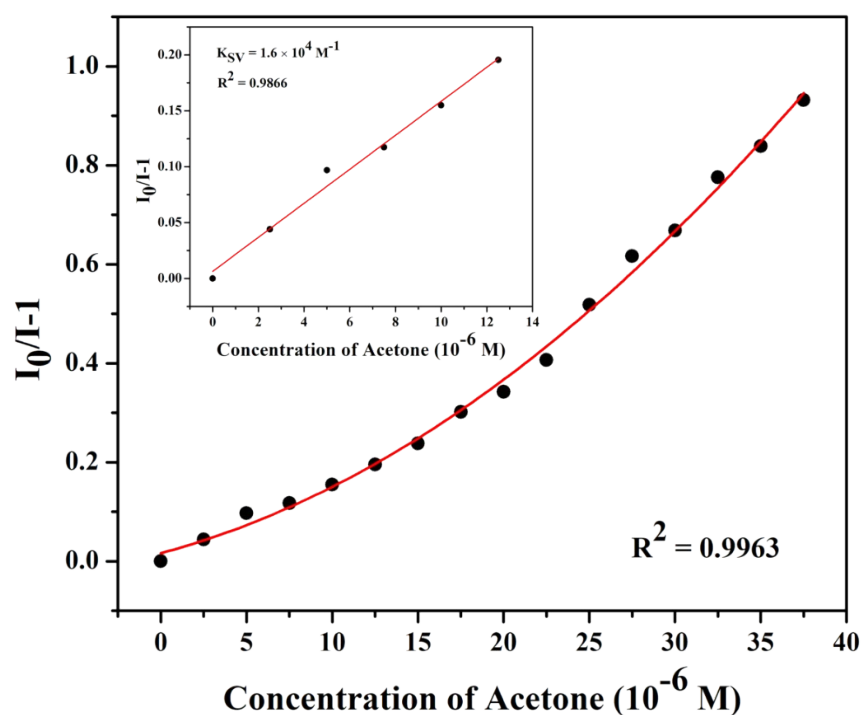

**Fig. S11** S-V plot of KA@CP-S3 dispersed in ethanolic solution after gradual addition of Acetone (1 mM), the linear S-V curve of KA@CP-S3 at low concentration of Acetone (inset).



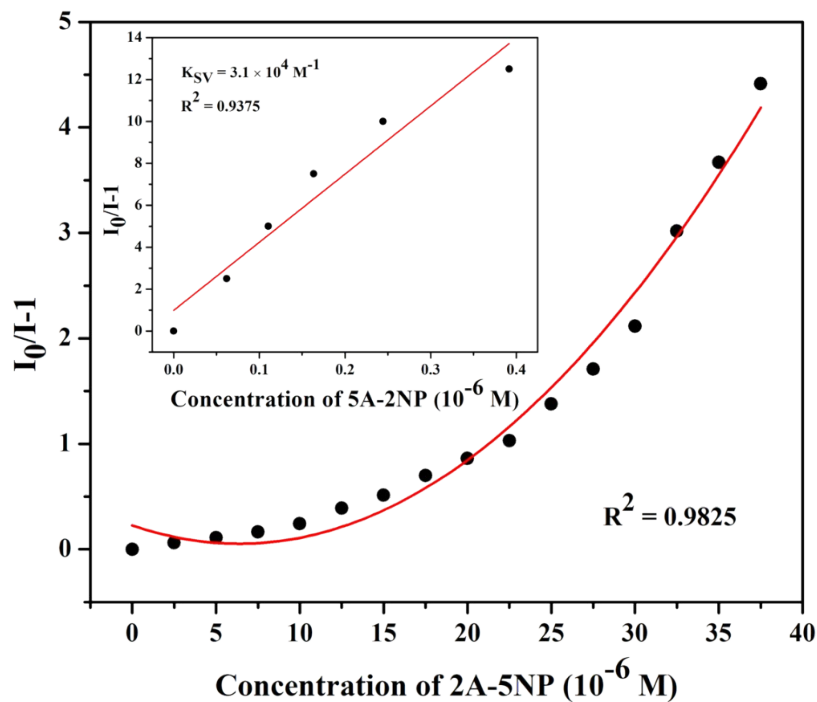

**Fig. S12**  $S$ - $V$  plot of **KA@CP-S3** dispersed in ethanolic solution after gradual addition of 2A-5NP (1 mM), the linear  $S$ - $V$  curve of **KA@CP-S3** at low concentration of 2A-5NP (inset).

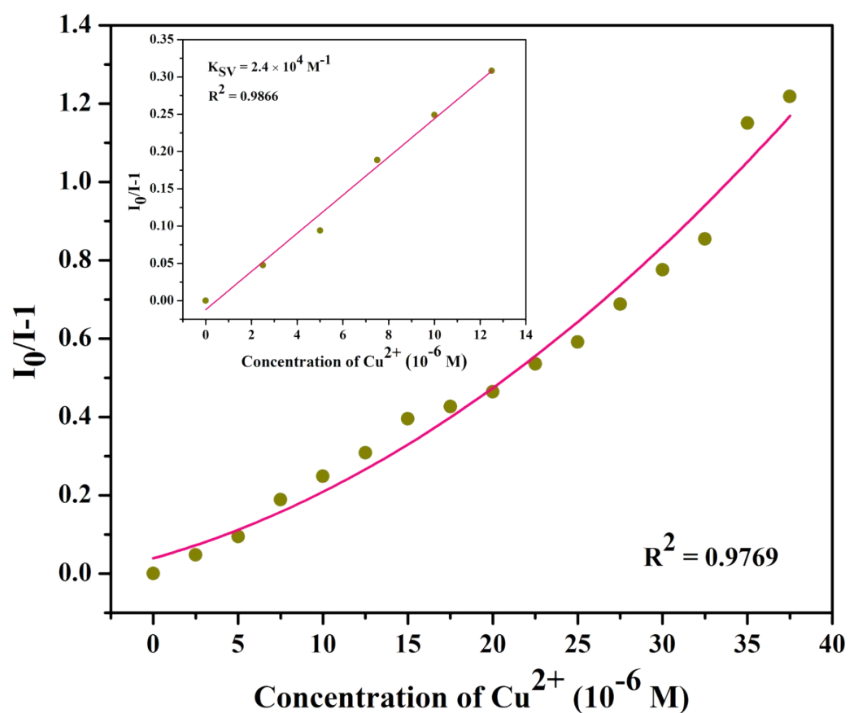

**Fig. S13**  $S$ - $V$  plot of **KA@CP-S3** dispersed in ethanolic solution after gradual addition of  $\text{Cu}^{2+}$  (1 mM), the linear  $S$ - $V$  curve of **KA@CP-S3** at low concentration of  $\text{Cu}^{2+}$  (inset).

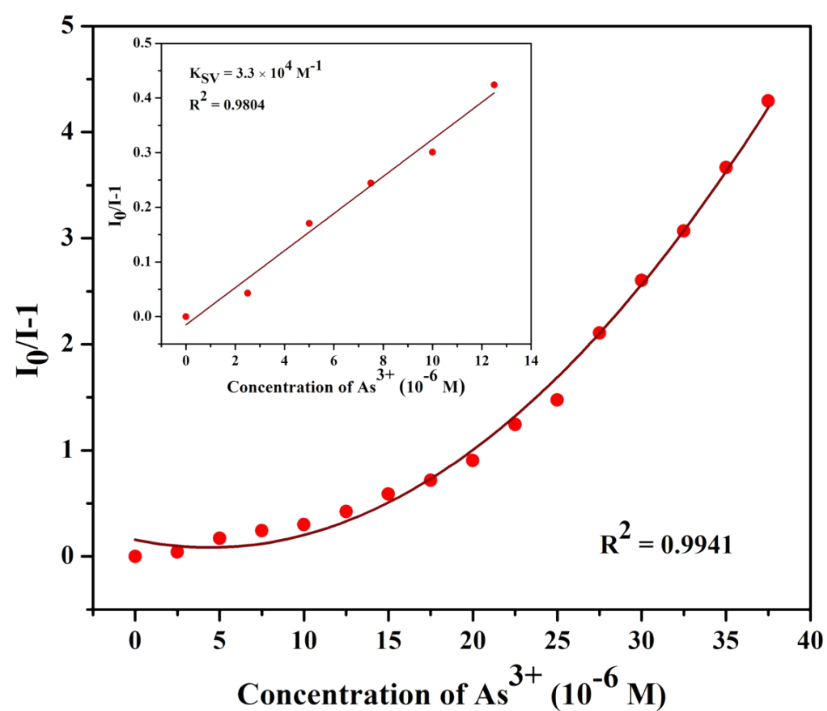

**Fig. S14**  $S$ - $V$  plot of **KA@CP-S3** dispersed in ethanolic solution after gradual addition of  $\text{As}^{3+}$  (1 mM), the linear  $S$ - $V$  curve of **KA@CP-S3** at low concentration of  $\text{As}^{3+}$  (inset).

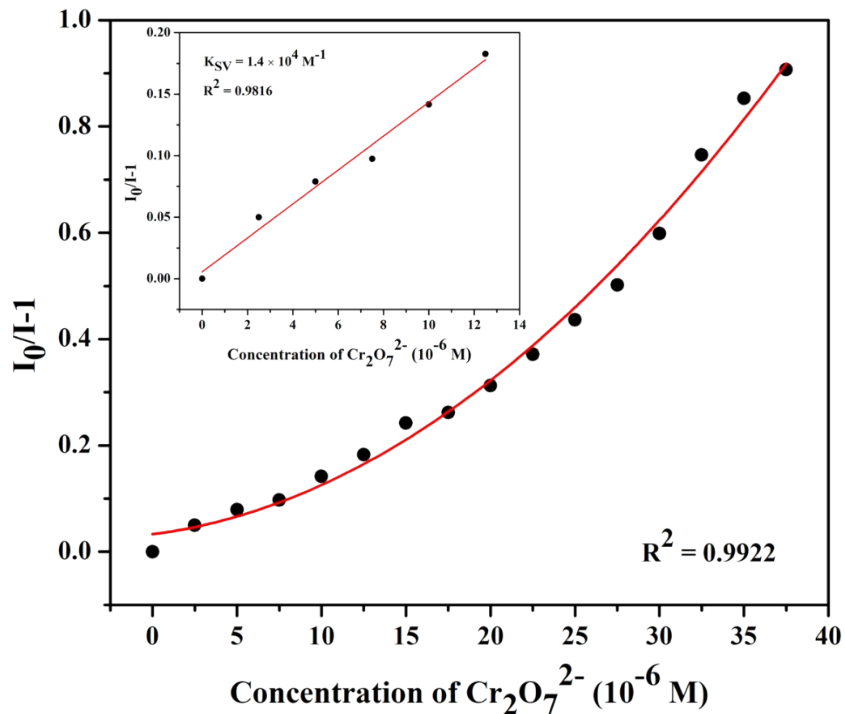

**Fig. S15**  $S$ - $V$  plot of **KA@CP-S3** dispersed in ethanolic solution after gradual addition of  $\text{Cr}_2\text{O}_7^{2-}$  (1 mM), the linear  $S$ - $V$  curve of **KA@CP-S3** at low concentration of  $\text{Cr}_2\text{O}_7^{2-}$  (inset).

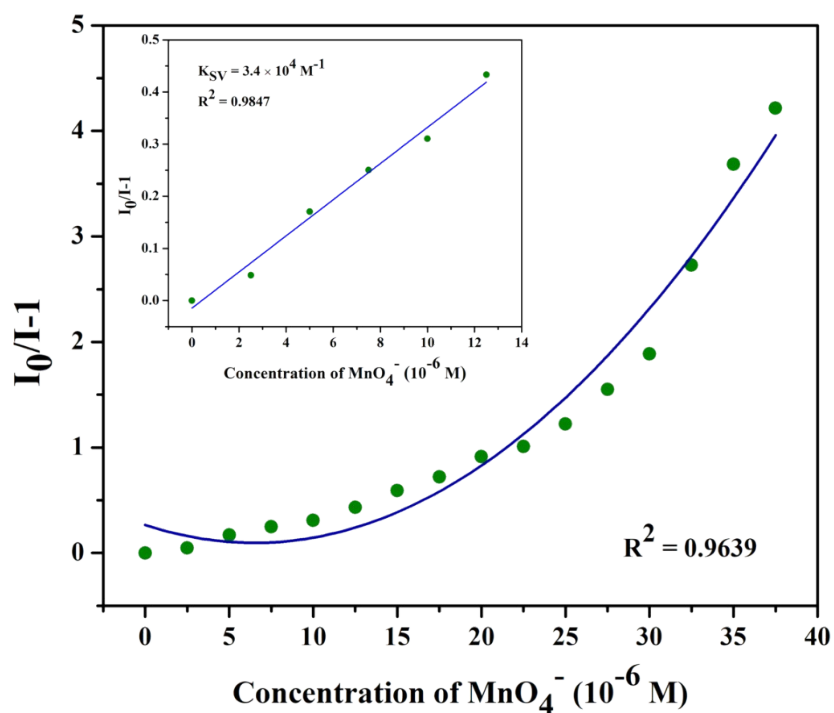

**Fig. S16**  $S$ - $V$  plot of **KA@CP-S3** dispersed in ethanolic solution after gradual addition of  $\text{MnO}_4^-$  (1 mM), the linear  $S$ - $V$  curve of **KA@CP-S3** at low concentration of  $\text{MnO}_4^-$  (inset).

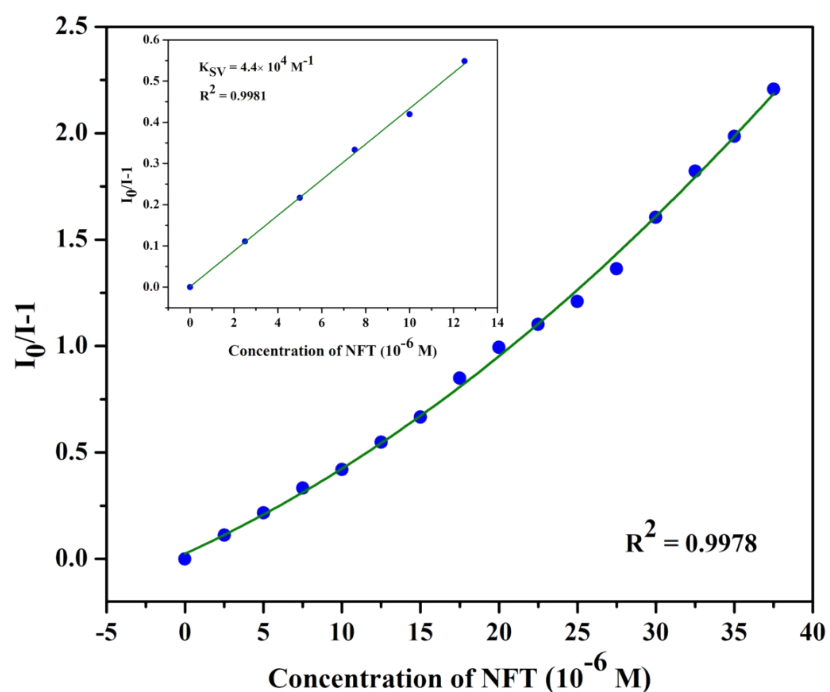

**Fig. S17**  $S$ - $V$  plot of **KA@CP-S3** dispersed in aqueous solution after gradual addition of **NFT** (1 mM), the linear  $S$ - $V$  curve of **KA@CP-S3** at low concentration of **NFT** (inset).

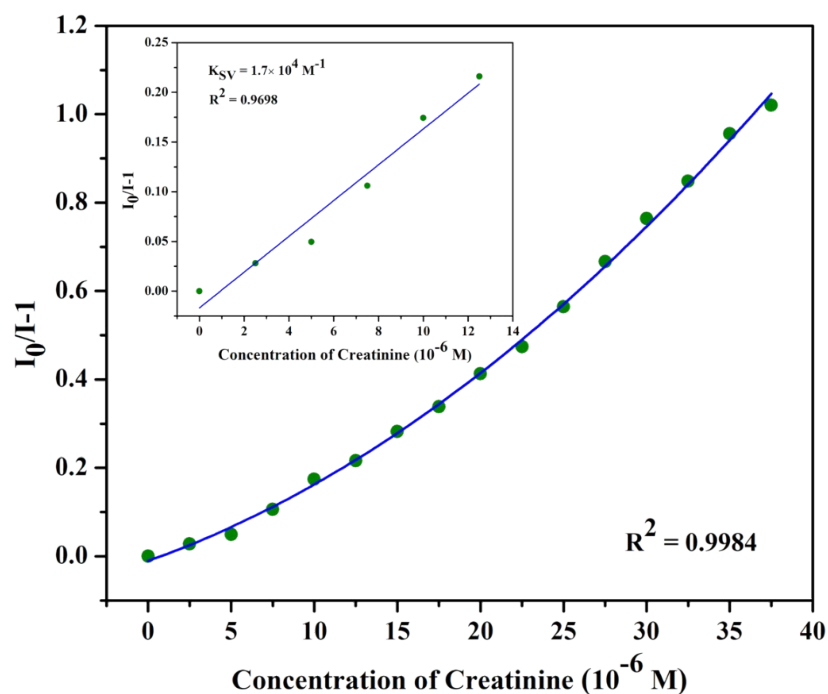

**Fig. S18**  $S$ – $V$  plot of **KA@CP-S3** dispersed in aqueous solution after gradual addition of Creatinine (1 mM), the linear  $S$ – $V$  curve of **KA@CP-S3** at low concentration of Creatinine (inset).

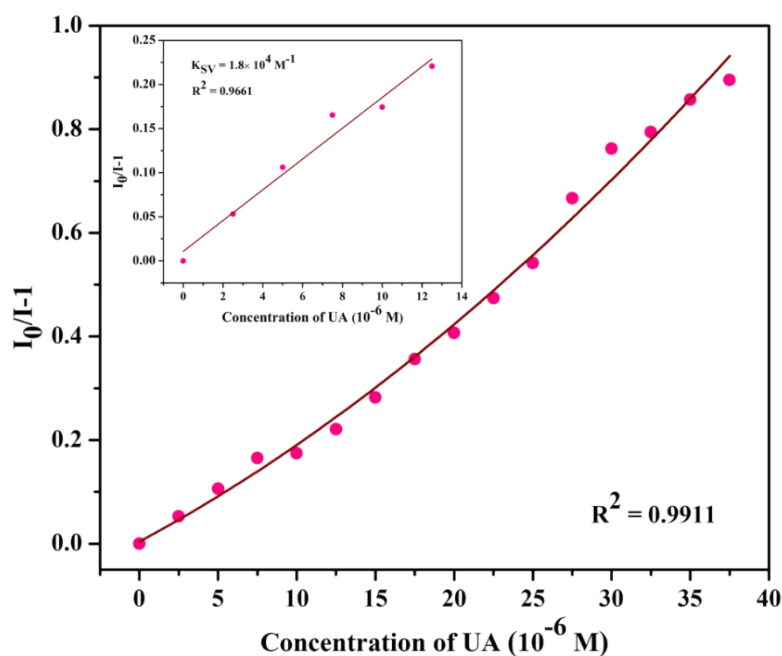

**Fig. S19**  $S$ – $V$  plot of **KA@CP-S3** dispersed in aqueous solution after gradual addition of UA (1 mM), the linear  $S$ – $V$  curve of **KA@CP-S3** at low concentration of UA (inset).

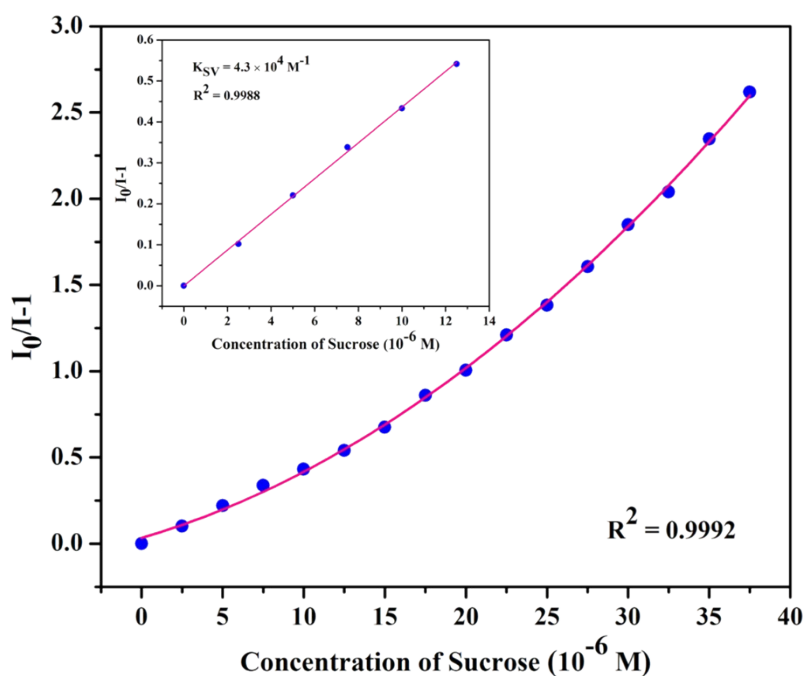

**Fig. S20**  $S-V$  plot of **KA@CP-S3** dispersed in aqueous solution after gradual addition of Sucrose (1 mM), the linear  $S-V$  curve of **KA@CP-S3** at low concentration of Sucrose (inset).

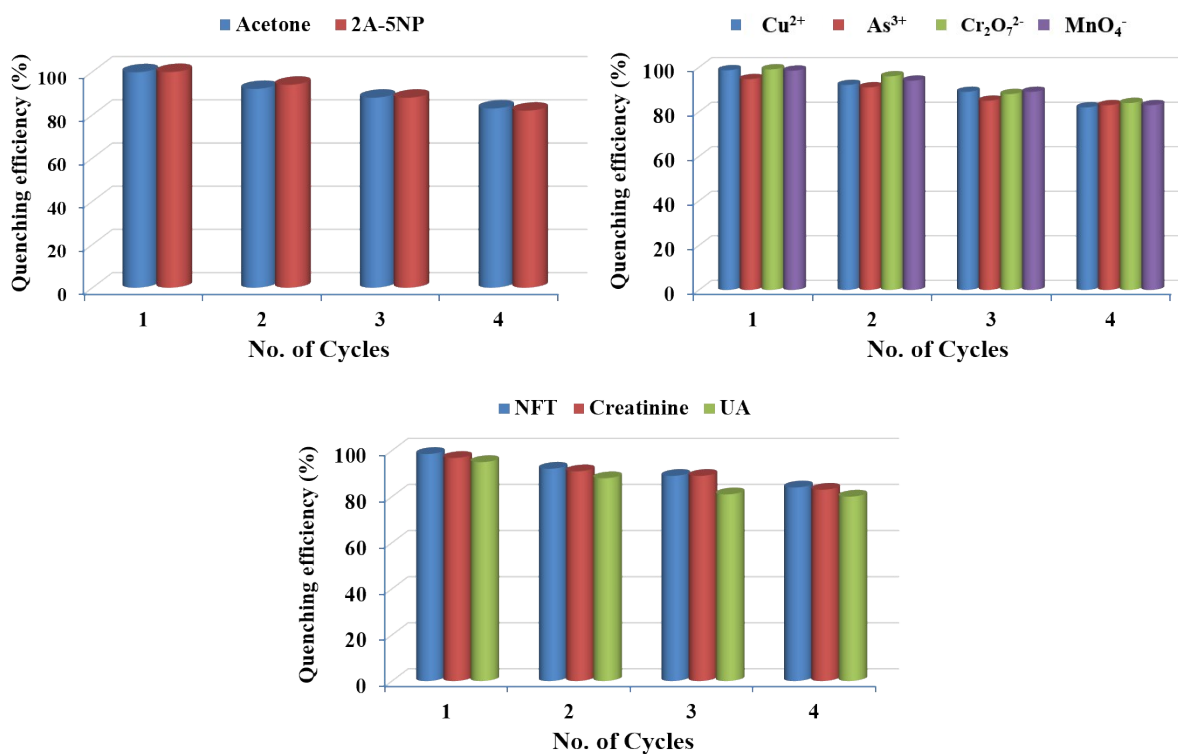

**Fig. S21** Catalysts reusability of **KA@CP-S3** for each cycle.

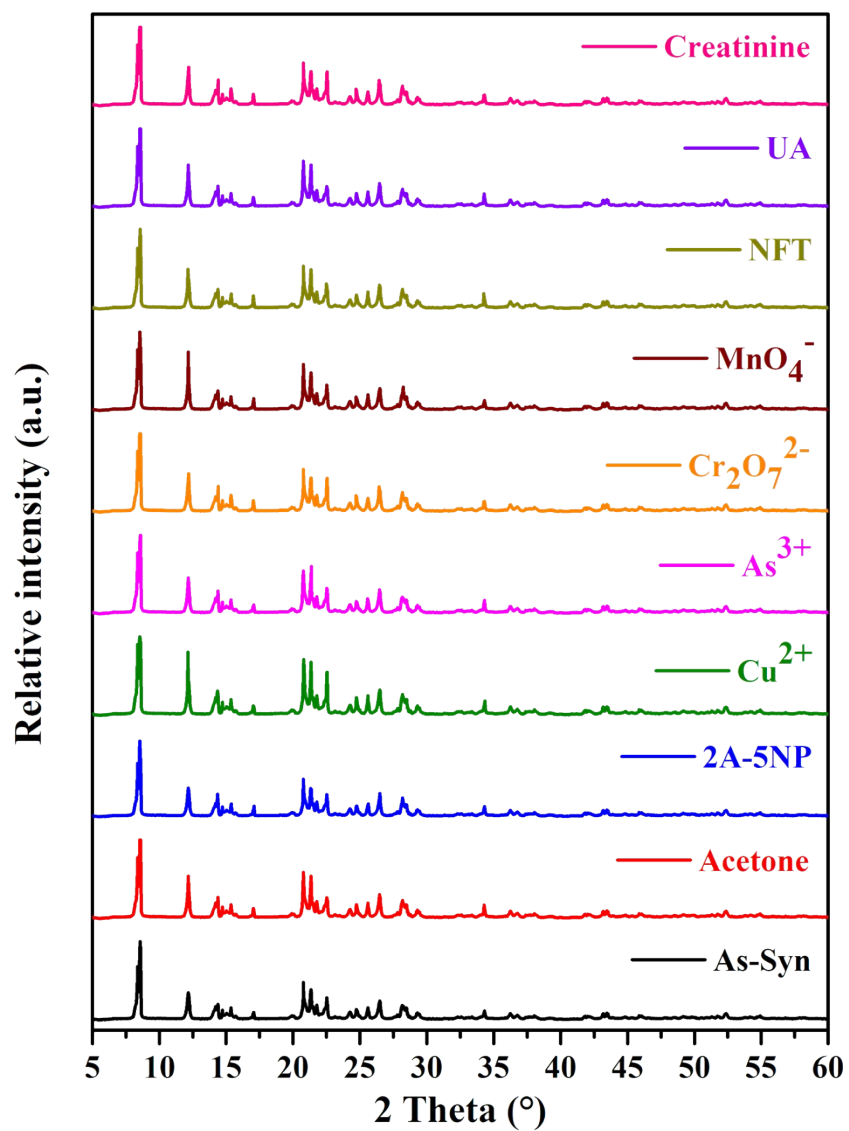

**Fig. S22** PXRD patterns of KA@CP-S3 before and after fluorescence sensing of various analytes.

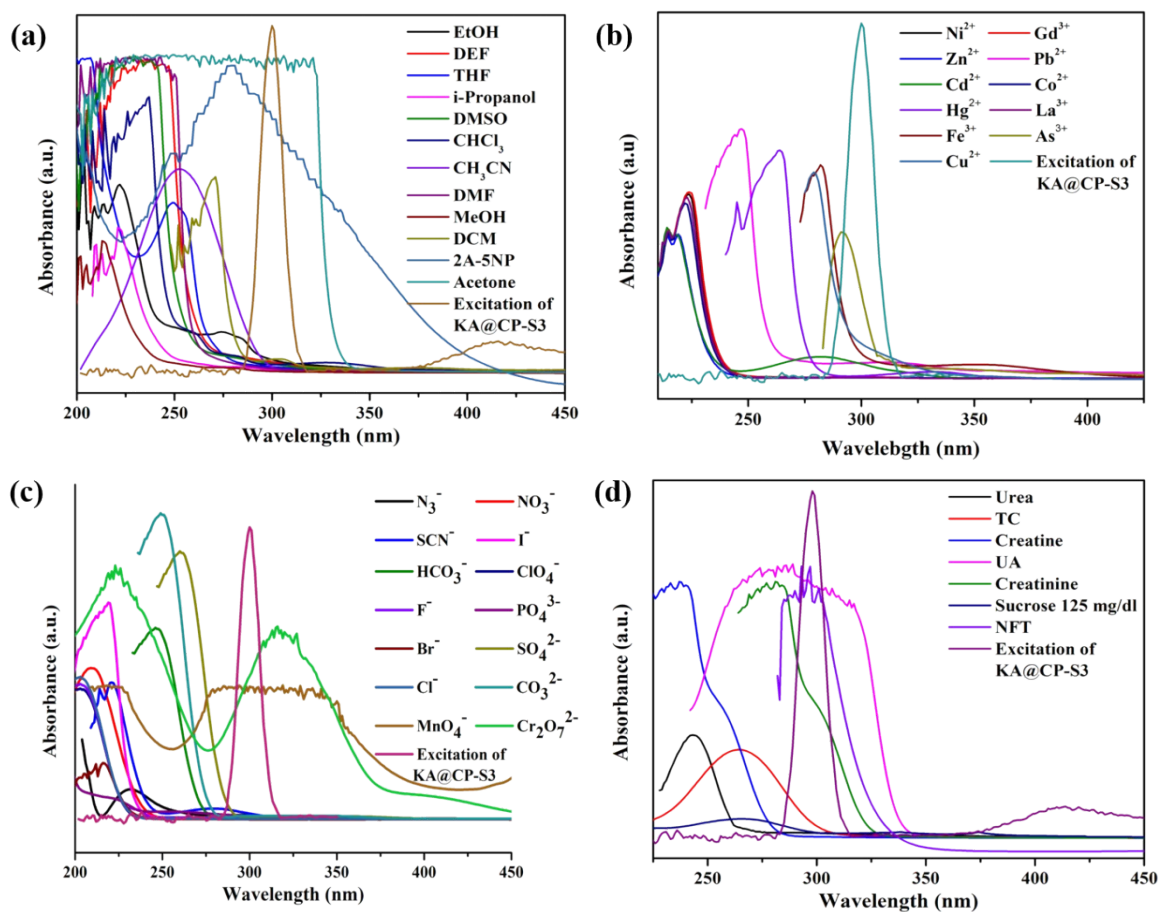

**Fig. S23** Spectral overlap between the UV-Vis absorption spectra of various analytes and the excitation spectra of KA@CP-S3.

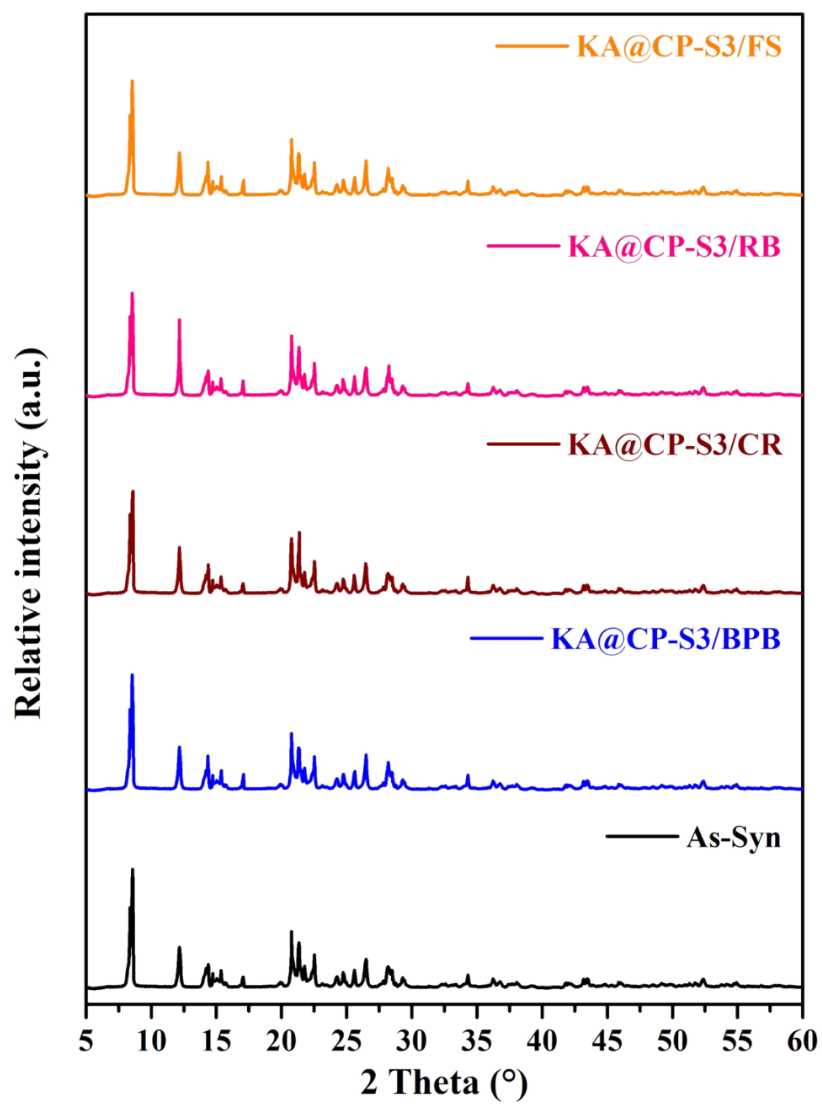

**Fig. S24** PXRD patterns of **KA@CP-S3** before and after photocatalytic experiments with dyes (BPB, CR, RB and FS).



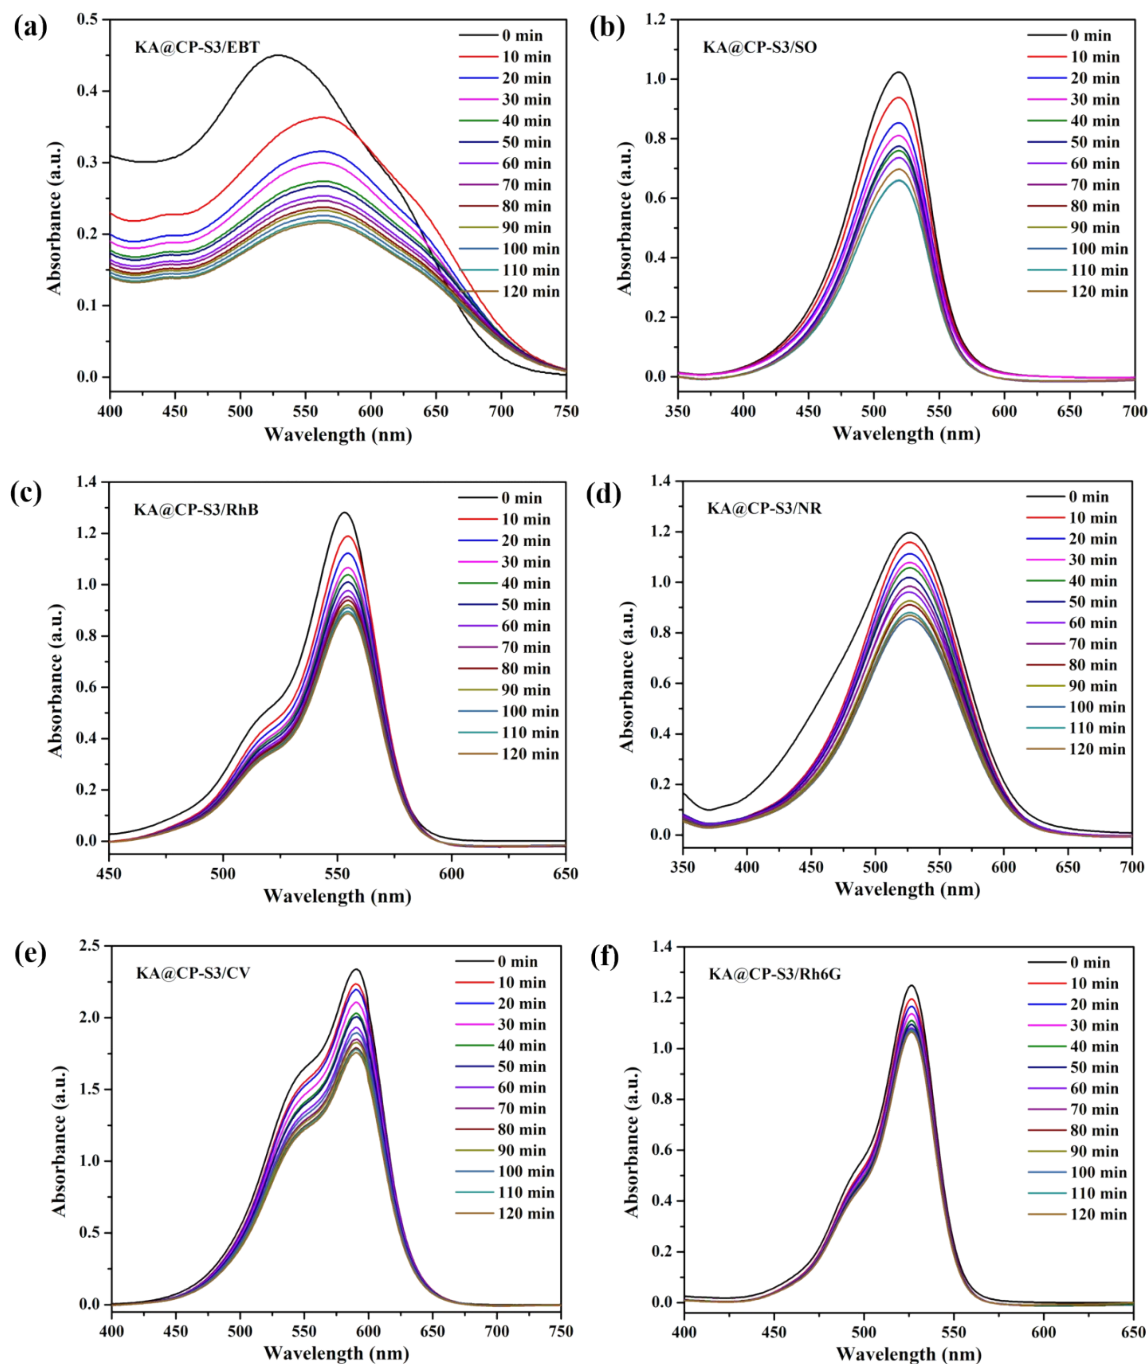

**Fig. S25** Time-dependent UV-Vis absorption spectra of dyes (a) EBT, (b) SO, (c) RhB, (d) NR, (e) CV and (f) Rh6G with catalysts **KA@CP-S3**.

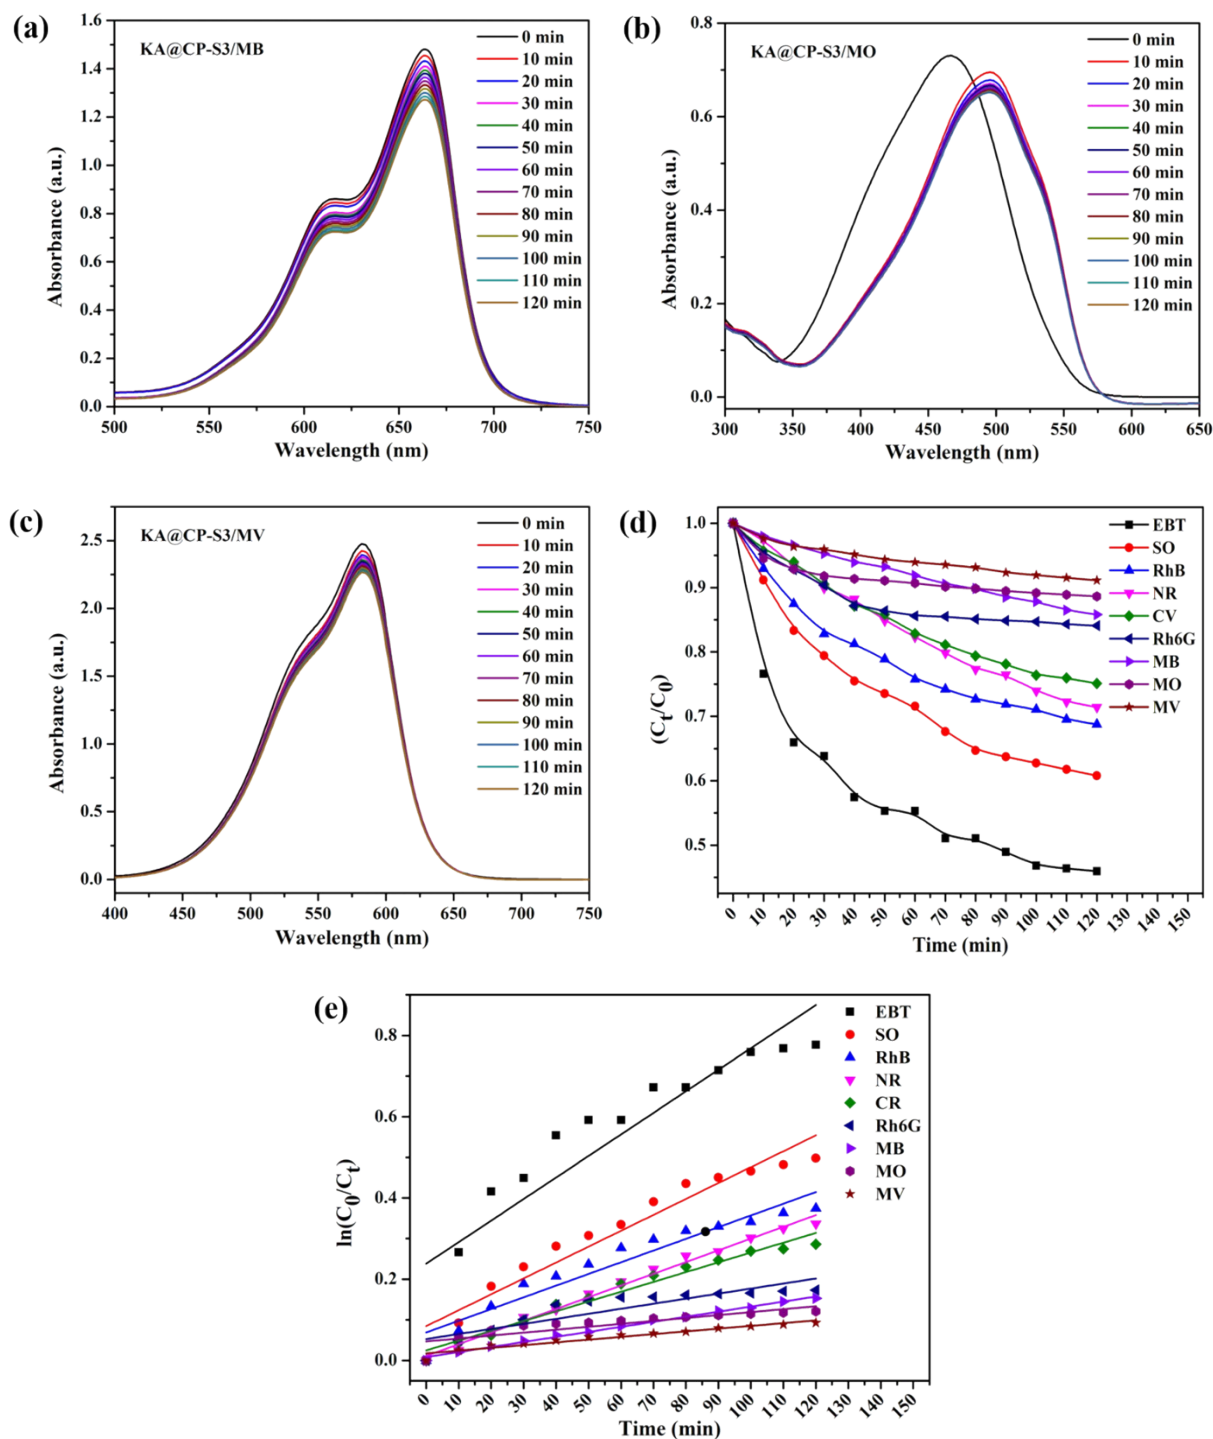

**Fig. S26** Time-dependent UV-Vis absorption spectra of dyes (a) MB, (b) MO and (c) MV with catalysts **KA@CP-S3** (d) The Photocatalytic degradation kinetic plot of such dyes  $C_t/C_0$  versus time interval plot and (e) Plot of  $\ln(C_0/C_t)$  versus time interval in the presence of catalysts.

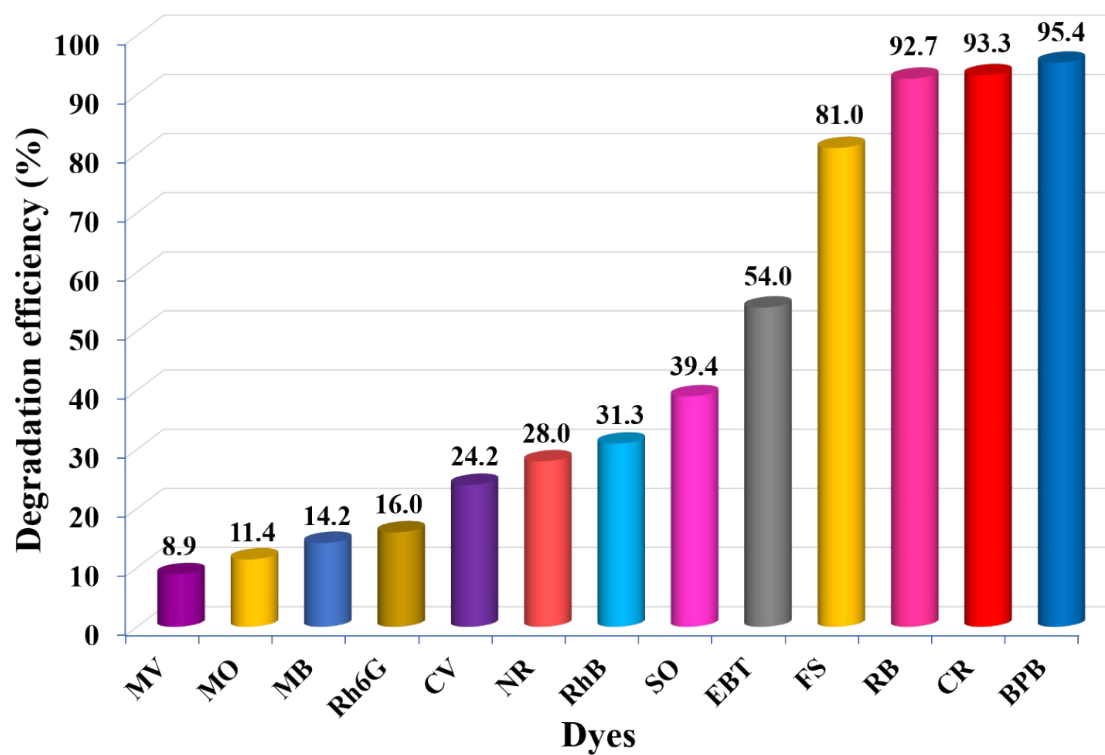

Fig. S27 Photocatalytic degradation efficiencies of KA@CP-S3 for dyes.

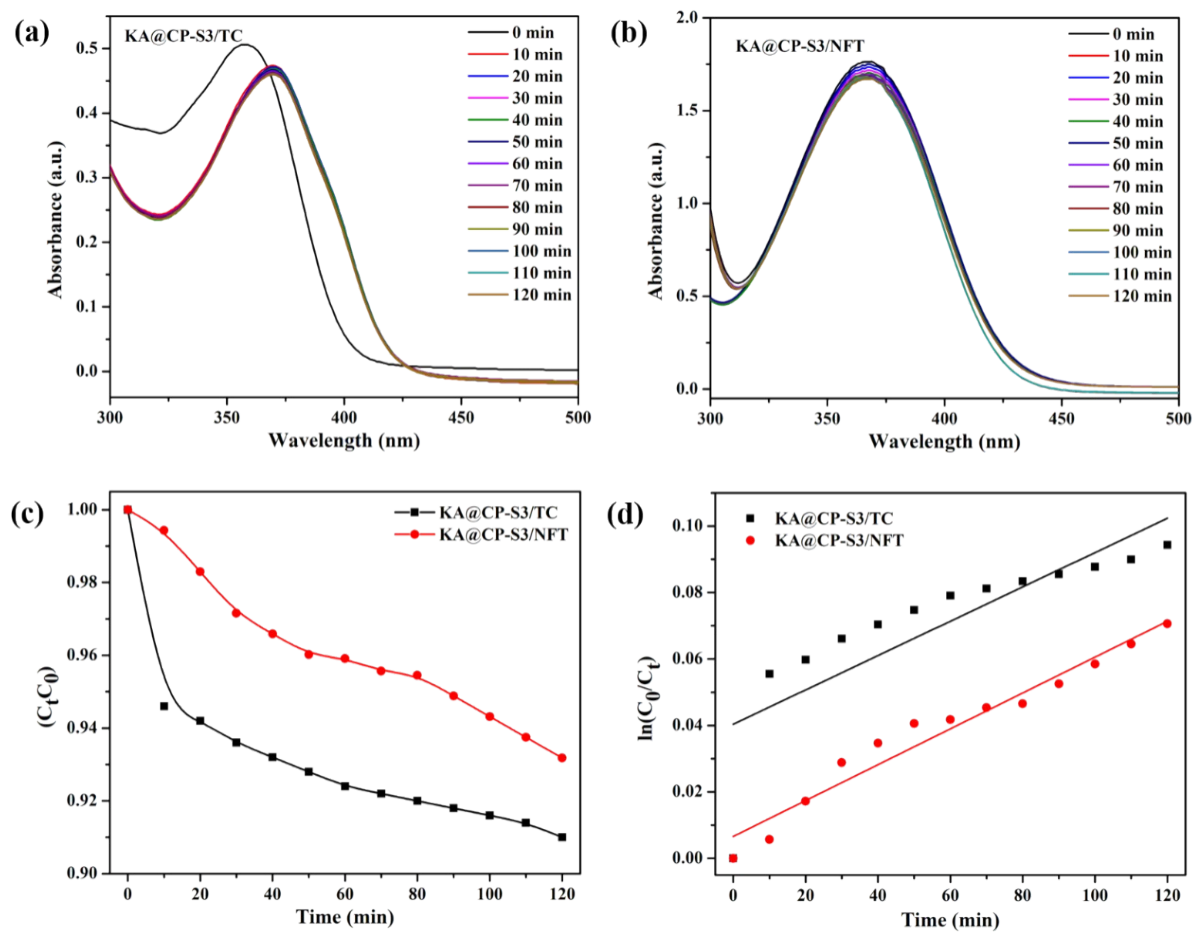

**Fig. S28** Time-dependent UV-Vis absorption spectra of (a) TC and (c) NFT with catalysts KA@CP-S3 (d) The Photocatalytic degradation kinetic plot  $C_t/C_0$  versus time interval plot and (e) Plot of  $\ln(C_0/C_t)$  versus time interval in the presence of catalysts.

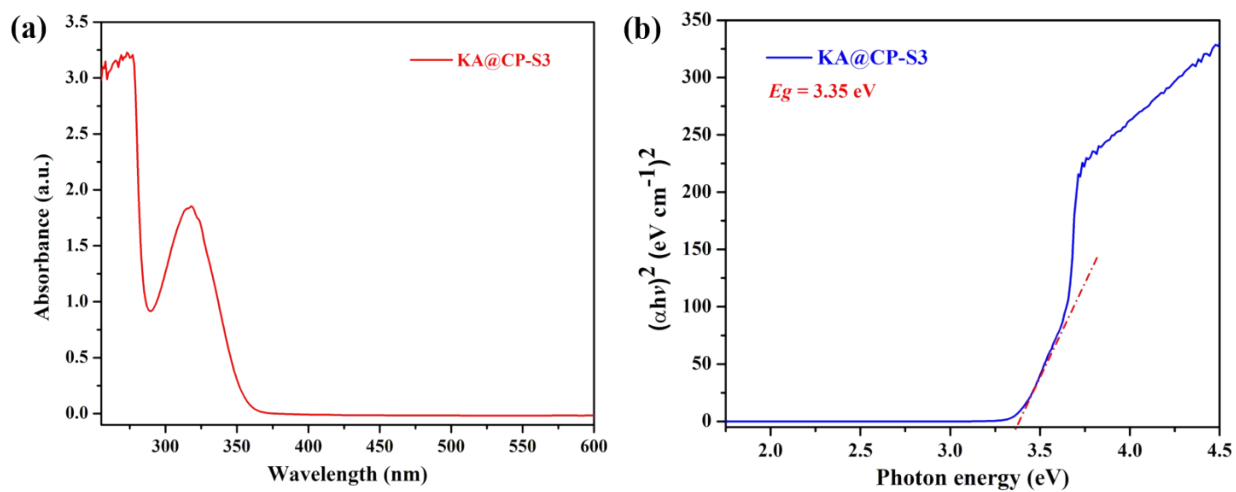

**Fig. S29** (a) UV-Vis absorption spectra and (b) Tauc plot ( $(\alpha h\nu)^2$  vs energy (eV)) for band gap study of KA@CP-S3.
